# Supplementary material for: Tumor cell-specific photothermal killing by SELEX-derived DNA aptamer-targeted gold nanorods
Source: Royal Society of Chemistry journal article supplement (doi:10.1039/c5nr07831h), 2015-11-30
Supplement: c5nr07831h1.pdf [file c5nr07831h1.pdf]

## **Tumor Cell-Specific Photothermal Killing by SELEX-Derived DNA Aptamer-Targeted Gold Nanorods**

Ramya Chandrasekaran<sup>a</sup>, Alexander Sheng Wei Lee<sup>b</sup>, Lim Wei Yap<sup>a</sup>, David A. Jans<sup>b</sup>, Kylie  
M. Wagstaff<sup>b\*</sup> and Wenlong Cheng<sup>a\*</sup>

<sup>a</sup> Department of Chemical Engineering, Monash University VIC 3800 Australia

Email: wenlong.cheng@monash.edu;

<sup>b</sup> Department of Biochemistry and Molecular Biology, Monash University, VIC 3800,  
Australia

Email: kylie.wagstaff@monash.edu

‡ Electronic Supplementary Information (ESI) available: Confocal images of aptamer incubated with 293T, A549 or HeLa cells, FTIR Spectra of PEG-GNR, Gel Electrophoresis of Apt-GNR and Time dependent temperature curve of GNRs.

## Supplementary Data

### Supplementary Figure S1.

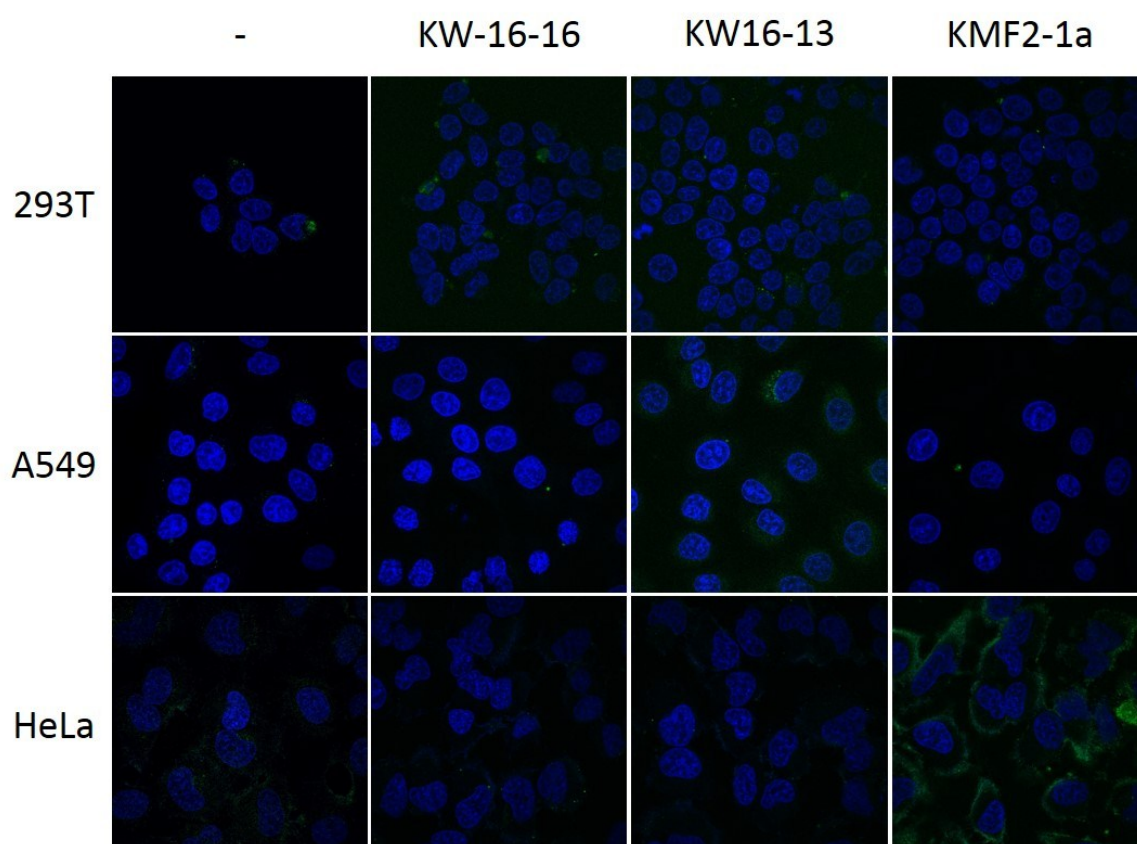

### Supplementary Figure 1. KW16 aptamers do not bind to other tumour cell types.

The indicated aptamers were incubated with 293T, A549 or HeLa cells for 4 h at 37°C, washed and imaged live by CLSM in the presence of DAPI.

## Supplementary Figure S2.

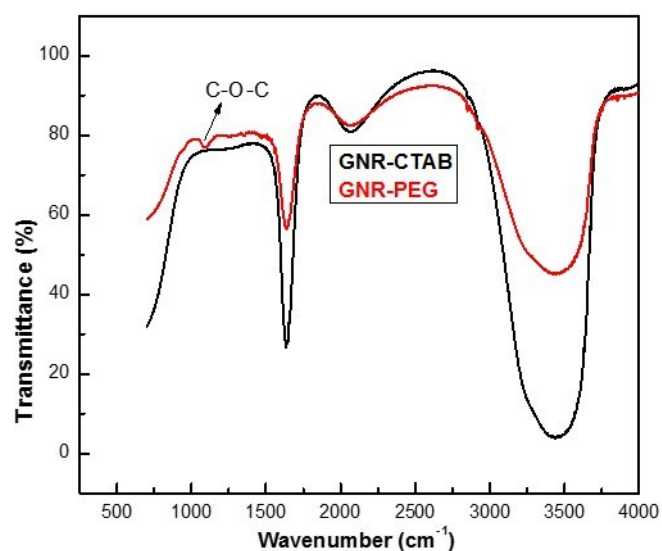

## Supplementary Figure 2 FTIR spectra comparing CTAB and PEG coated GNRs

The CTAB and PEG coated GNRs were analysed using FTIR spectra. The presence of 1100  $\text{cm}^{-1}$  corresponding to C-O-C stretching present in PEG-GNR but not in CTAB-GNR confirmed the replacement of CTAB with mPEG-SH<sup>1</sup>.

### Supplementary Figure S3

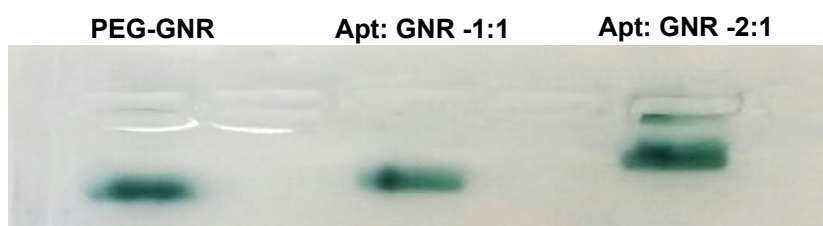

### Supplementary Figure 3 Agarose Gel Electrophoresis

The indicated PEG- or APT-GNR constructs were subjected to agarose gel electrophoresis for 30 min at 90 V. The KW16-13 Apt-GNRs showed reduced mobility compared to the PEG-GNRs, consistent with an increase in mass from the Apt functionalization. Similarly the GNRs coupled with KW16-13 in a 2:1 ratio had a further decrease in mobility compared to those coupled at 1:1 consistent with extra mass resultant from additional Apt coupling.

#### Supplementary Figure S4

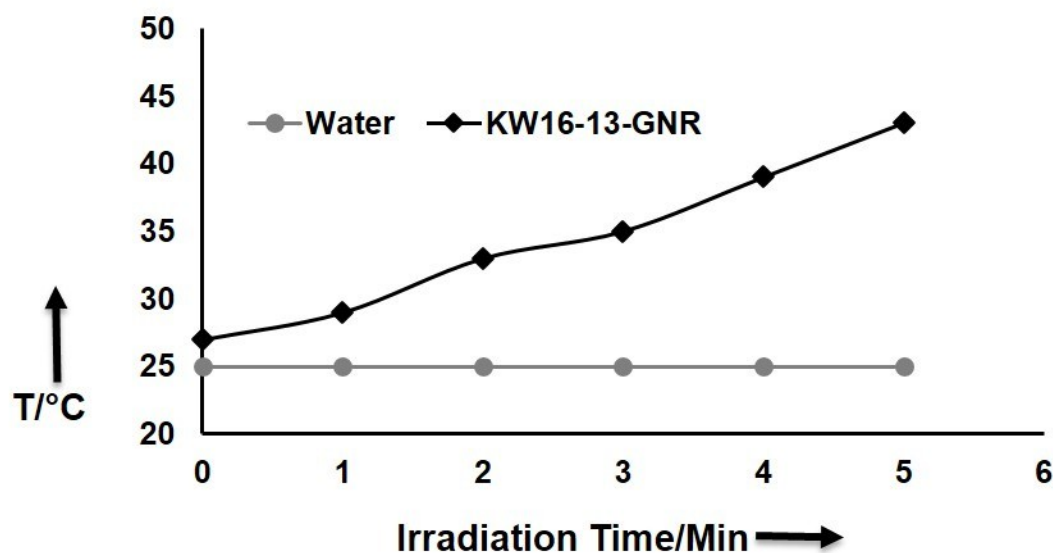

#### Supplementary Figure 4 Temperature-time curve of KW16-13-GNRs upon irradiation with 808 nm laser.

500  $\mu$ l of Apt-GNRs (0.8 nM) dispersed in water were irradiated with 808 nm CW diode laser (Chanchung New Industries Opto electronics Tech.co. Ltd) at a power density of 600 mW for 5 mins. The temperature change per minute was recorded using a Ryobi Digital Infrared Thermometer. As the time increased, the temperature also increased from 27°C to 43°C clearly indicating their plasmonic photothermal property.

#### References:

1. J. Vonnemann, N. Beziere, C. Böttcher, S. B. Riese, C. Kuehne, J. Dervedde, K. Licha, C. von Schacky, Y. Kosanke, M. Kimm, R. Meier, V. Ntziachristos and R. Haag, *Theranostics*, 2014, **4**, 629-641.
